# Supplementary material
Source: Royal Society of Chemistry journal article supplement (doi:10.1039/d5rp00432b)
Supplement: d5rp00432b1.pdf [file d5rp00432b1.pdf]

A list of opposing words appears below. Rate how well these words describe your feelings about **chemistry**. Think carefully and **try not to include** your feelings toward chemistry teachers or chemistry courses. For each line, choose a position between the two words that describes **exactly how you feel**. The middle position (4) is if you are undecided or have no feelings related to the terms on that line.

-----  
**Chemistry is...**

**Easy**

Middle

**Hard**

1 2 3 4 5 6 7

1 ( )

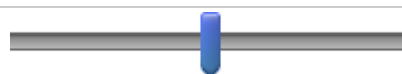

-----  
**Chemistry is...**

**Complicated**

Middle

**Simple**

1 2 3 4 5 6 7

1 ( )

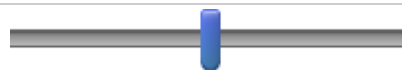

-----  
**Chemistry is...**

**Confusing**

Middle

**Clear**

1 2 3 4 5 6 7

1 ( )

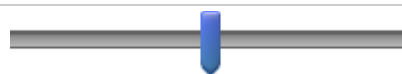

-----  
**Chemistry is...**

**Comfortable**

Middle

**Uncomfortable**

1 2 3 4 5 6 7

1 ()

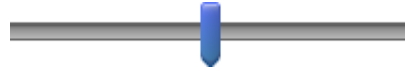

Chemistry is...

**Satisfying** Middle **Unsatisfying**

1 2 3 4 5 6 7

1 ()

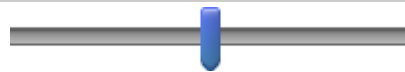

Chemistry is...

**Challenging** Middle **Not challenging**

1 2 3 4 5 6 7

1 ()

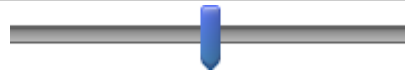

Chemistry is...

**Pleasant** Middle **Unpleasant**

1 2 3 4 5 6 7

1 ()

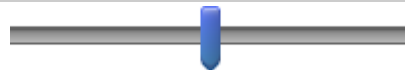

**Chemistry is...**

**Chaotic**                      **Middle**                      **Organized**

1    2    3    4    5    6    7

1 ()

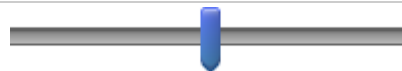

Using the scale below, indicate to what extent each of the following statements corresponds to one of the reasons why you are enrolled in this organic chemistry course.

|                                                                                                 | Not at all            | A little              | Moderately            | A lot                 | Exactly               |
|-------------------------------------------------------------------------------------------------|-----------------------|-----------------------|-----------------------|-----------------------|-----------------------|
| Because without having taken chemistry, I would not find a high-paying job later on             | <input type="radio"/> |
| Because I experience pleasure and satisfaction while learning new things                        | <input type="radio"/> |
| Because I think that chemistry courses will help me better prepare for the career I have chosen | <input type="radio"/> |
| For the feelings I experience when I am communicating chemistry ideas to others                 | <input type="radio"/> |
| Honestly, I don't know; I really feel that I am wasting my time taking chemistry courses        | <input type="radio"/> |
| For the satisfaction I experience while improving my understanding of chemistry                 | <input type="radio"/> |

To prove to myself that I am capable of succeeding in chemistry

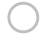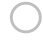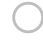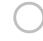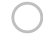

Using the scale below, indicate to what extent each of the following statements corresponds to one of the reasons why you are enrolled in this organic chemistry course.

|                                                                                                       | Not at all            | A little              | Moderately            | A lot                 | Exactly               |
|-------------------------------------------------------------------------------------------------------|-----------------------|-----------------------|-----------------------|-----------------------|-----------------------|
| In order to obtain a better job later on                                                              | <input type="radio"/> |
| For the pleasure I experience when I learn new things about chemistry                                 | <input type="radio"/> |
| Because taking chemistry will enable me to enter the job market in a field that I like                | <input type="radio"/> |
| For the pleasure that I experience when I perform chemistry experiments                               | <input type="radio"/> |
| I once had good reasons for taking chemistry courses; however, now I wonder whether I should continue | <input type="radio"/> |
| For the satisfaction I experience while succeeding in chemistry                                       | <input type="radio"/> |

Because  
when I  
succeed in  
chemistry I  
feel smart

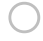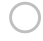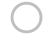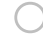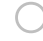

Using the scale below, indicate to what extent each of the following statements corresponds to one of the reasons why you are enrolled in this organic chemistry course.

|                                                                                                  | Not at all            | A little              | Moderately            | A lot                 | Exactly               |
|--------------------------------------------------------------------------------------------------|-----------------------|-----------------------|-----------------------|-----------------------|-----------------------|
| Because I want to have a well-paying career (                                                    | <input type="radio"/> |
| For the pleasure that I experience in broadening my knowledge about chemistry                    | <input type="radio"/> |
| Because taking chemistry courses will help me make more informed choices about my career options | <input type="radio"/> |
| For the enjoyment I experience when I think about the world in terms of atoms and molecules      | <input type="radio"/> |
| I don't know why I take chemistry courses, I couldn't care less about them                       | <input type="radio"/> |
| For the satisfaction I feel as I work toward an understanding of chemistry                       | <input type="radio"/> |

To show myself that I am an intelligent person

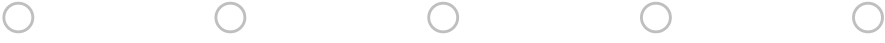

Using the scale below, indicate to what extent each of the following statements corresponds to one of the reasons why you are enrolled in this organic chemistry course.

|                                                                                         | Not at all            | A little              | Moderately            | A lot                 | Exactly               |
|-----------------------------------------------------------------------------------------|-----------------------|-----------------------|-----------------------|-----------------------|-----------------------|
| In order to have a better salary later on                                               | <input type="radio"/> |
| Because studying chemistry allows me to continue to learn about things that interest me | <input type="radio"/> |
| Because I believe that chemistry courses will improve my skills in my chosen career     | <input type="radio"/> |
| For the satisfaction I experience while learning about various chemistry topics         | <input type="radio"/> |
| I don't know; I can't understand what I am doing taking chemistry courses               | <input type="radio"/> |
| Because chemistry courses allow me to experience satisfaction in my quest for knowledge | <input type="radio"/> |

Because I  
want to show  
myself that I  
can succeed  
in studying  
chemistry

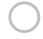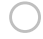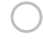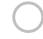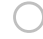

Using the scale below, indicate to how strongly you disagree or agree with each of the following statements.

|                                                                                             | Strongly disagree     | Somewhat disagree     | Neither agree nor disagree | Somewhat agree        | Strongly agree        |
|---------------------------------------------------------------------------------------------|-----------------------|-----------------------|----------------------------|-----------------------|-----------------------|
| To tell the truth, when I work hard at chemistry, it makes me feel like I'm not very smart. | <input type="radio"/> | <input type="radio"/> | <input type="radio"/>      | <input type="radio"/> | <input type="radio"/> |
| It doesn't matter how hard you work—if you're not smart, you won't do well.                 | <input type="radio"/> | <input type="radio"/> | <input type="radio"/>      | <input type="radio"/> | <input type="radio"/> |
| If you're not good at a chemistry, working hard won't make you good at it.                  | <input type="radio"/> | <input type="radio"/> | <input type="radio"/>      | <input type="radio"/> | <input type="radio"/> |
| If chemistry is hard for me, it means I probably won't be able to do really well at it.     | <input type="radio"/> | <input type="radio"/> | <input type="radio"/>      | <input type="radio"/> | <input type="radio"/> |
| If you're not doing well at chemistry, it's better to try something easier.                 | <input type="radio"/> | <input type="radio"/> | <input type="radio"/>      | <input type="radio"/> | <input type="radio"/> |

Using the scale below, indicate to how strongly you disagree or agree with each of the following statements.

|                                                                                | Strongly disagree     | Somewhat disagree     | Neither agree nor disagree | Somewhat agree        | Strongly agree        |
|--------------------------------------------------------------------------------|-----------------------|-----------------------|----------------------------|-----------------------|-----------------------|
| When chemistry is hard, it just makes me want to work more on it, not less.    | <input type="radio"/> | <input type="radio"/> | <input type="radio"/>      | <input type="radio"/> | <input type="radio"/> |
| If you don't work hard and put in a lot of effort, you probably won't do well. | <input type="radio"/> | <input type="radio"/> | <input type="radio"/>      | <input type="radio"/> | <input type="radio"/> |
| The harder you work at chemistry, the better you will be at it.                | <input type="radio"/> | <input type="radio"/> | <input type="radio"/>      | <input type="radio"/> | <input type="radio"/> |
| If an assignment is hard, it means I'll probably learn a lot doing it.         | <input type="radio"/> | <input type="radio"/> | <input type="radio"/>      | <input type="radio"/> | <input type="radio"/> |

The following questions ask about your motivation for and attitudes about this class. Remember there are no right or wrong answers, just answer as accurately as possible. Use the scale below to answer the questions. If you think the statement is very true of you, select 5; if a statement is not at all true of you, select 1. If the statement is more or less true of you, find the number between 1 and 5 that best describes you.

|                                                                                                     | Not at all true<br>of me 1 | 2                     | 3                     | 4                     | More or less<br>true of me 5 |
|-----------------------------------------------------------------------------------------------------|----------------------------|-----------------------|-----------------------|-----------------------|------------------------------|
| I believe I will receive an excellent grade in this class                                           | <input type="radio"/>      | <input type="radio"/> | <input type="radio"/> | <input type="radio"/> | <input type="radio"/>        |
| I'm certain I can understand the most difficult material presented in the readings for this course  | <input type="radio"/>      | <input type="radio"/> | <input type="radio"/> | <input type="radio"/> | <input type="radio"/>        |
| I'm confident I can understand the basic concepts taught in this course                             | <input type="radio"/>      | <input type="radio"/> | <input type="radio"/> | <input type="radio"/> | <input type="radio"/>        |
| I'm confident I can understand the most complex material presented by the instructor in this course | <input type="radio"/>      | <input type="radio"/> | <input type="radio"/> | <input type="radio"/> | <input type="radio"/>        |
| I'm confident I can do an excellent job on the assignments and quizzes/exams in this course         | <input type="radio"/>      | <input type="radio"/> | <input type="radio"/> | <input type="radio"/> | <input type="radio"/>        |

I expect to do well in this class

I'm certain I can master the skills being taught in this class

Considering the difficulty of this this course, the teacher, and my skills, I think I can do well in this class

**How accurately does each statement describe you?**

|                                                                                   | very<br>inaccurate 1  | 2                     | 3                     | 4                     | very accurate<br>5    |
|-----------------------------------------------------------------------------------|-----------------------|-----------------------|-----------------------|-----------------------|-----------------------|
| I am quite good at dealing with chemical ideas.                                   | <input type="radio"/> |
| Chemistry intimidates me.                                                         | <input type="radio"/> |
| I would hesitate to enroll in courses that involve chemistry.                     | <input type="radio"/> |
| I have always done better in courses that involve chemistry than in most courses. | <input type="radio"/> |
| When I run into chemical topics in my courses, I always do well on that part.     | <input type="radio"/> |
| I have trouble understanding anything based on chemistry.                         | <input type="radio"/> |
| I have never been excited about chemistry.                                        | <input type="radio"/> |
| I find chemistry concepts interesting and                                         | <input type="radio"/> |

challenging.

I have always had difficulty understanding arguments that require chemical knowledge.

I participate confidently in discussions with school friends about chemical topics.

What is your age?

---

What is your major?

---

What is your academic year?

- First year
- Second year
- Third year
- Fourth year
- Fifth year or beyond
- I am unsure of my academic year. This is how I would best describe my academic year:

---

---

Are you a part-time or full-time student?

- Part-time student (enrolled in 11 or fewer credits)
  - Full-time student (enrolled in 12 or more credits)
- 

Do you have a job or internship this semester?

- No
  - Yes, part-time job or internship
  - Yes, full-time job or internship
- 

Being a first-generation college student means that your parent(s) or guardian(s) did not complete a four-year college or university degree, regardless of other family member's level of education. Are you a first-generation college student?

- No
  - Yes
-

My gender or gender identity is best described as (select all that apply):

- I am agender
- I am a man
- I am nonbinary
- I am gender questioning
- I am gender nonconforming
- I am genderqueer or genderfluid
- I am questioning
- I am transgender
- I am a woman
- My gender or gender identity is best described as:  

---
- I prefer not to disclose my gender or gender identity

My racial or ethnic background is best described as (select all that apply):

**Black, Afro-Caribbean, or African American** (e.g., Jamaican, Nigerian, Haitian, Ethiopian, etc.)

**Asian or Asian American** (e.g., Chinese, Japanese, Filipino, Korean, South Asian, Vietnamese, etc.)

**Indigenous American or Alaska Native** (e.g., Navajo Nation, Blackfeet Tribe, Inupiat Traditional Gov't., etc.)

**Latino/a/e/x or Hispanic American** (e.g., Puerto Rican, Mexican, Cuban, Salvadoran, Colombian, etc.)

**Middle Eastern, North African, or Arab American** (e.g., Lebanese, Iranian, Egyptian, Moroccan, Israeli, Palestinian, etc.)

**Native Hawai'ian or Pacific Islander** (e.g., Samoan, Guamanian, Chamorro, Tongan, etc.)

**Non-Hispanic White or Euro-American** (e.g., German, Irish, English, Italian, Polish, French, etc.)

**My race or ethnicity is best described as:**

---

**I prefer not to disclose my racial or ethnic background.**
